# Supplementary material for: A pan-cancer analysis of potassium channel tetramerization domain containing 12 in human cancer
Source: Springer Nature journal article supplement (doi:10.1038/s41598-023-41091-8), 2023-08-25
Supplement: MOESM2 [file 41598_2023_41091_MOESM2_ESM.pdf]

The expression levels of KCTD12 protein in UCEC and KIRC in the CTPAC database.
