# Supplementary material for: A pan-cancer analysis of potassium channel tetramerization domain containing 12 in human cancer
Source: Sci Rep. 2023 Aug 25;13:13898. doi: 10.1038/s41598-023-41091-8 (PMC10457314; doi:10.1038/s41598-023-41091-8)
Supplement: Supplementary file 3 — Supplementary Table S1. [file 41598_2023_41091_MOESM3_ESM.xlsx]

## Sheet: Sheet 1
KEGG/GO analysis of KCTD12 related genes
Ontology	ID	Description	GeneRatio	BgRatio	pvalue	p.adjust	qvalue	geneID	Count
BP	GO:0035567	non-canonical Wnt signaling pathway	8/113	150/18670	3.61e-06	0.009	0.008	GNB1/ROR1/PSMA7/GNG2/PLEKHA4/SMURF2/PSMA8/PRICKLE2	8
BP	GO:0035588	G protein-coupled purinergic receptor signaling pathway	4/113	24/18670	1.23e-05	0.015	0.013	ADORA3/GNAI2/GPR34/P2RY13	4
BP	GO:0035587	purinergic receptor signaling pathway	4/113	32/18670	4.01e-05	0.027	0.023	ADORA3/GNAI2/GPR34/P2RY13	4
CC	GO:0030139	endocytic vesicle	9/121	303/19717	1.07e-04	0.023	0.021	CYBB/LPAR1/LRP1/RAB7A/PICALM/TBC1D5/TLR7/RAB14/RAB8B	9
CC	GO:0030136	clathrin-coated vesicle	7/121	188/19717	1.62e-04	0.023	0.021	LRP1/PICALM/TBC1D5/TMED10/RAB14/RAB8B/SNX18	7
CC	GO:0031234	extrinsic component of cytoplasmic side of plasma membrane	5/121	91/19717	2.45e-04	0.024	0.021	GNAI2/GNB1/GNG2/PLEKHA4/SNX18	5
MF	GO:0046332	SMAD binding	6/117	80/17697	1.48e-05	0.005	0.004	PARP1/BMPR2/MEF2A/PURA/SKI/SMURF2	6
MF	GO:1901981	phosphatidylinositol phosphate binding	7/117	161/17697	9.71e-05	0.015	0.013	OSBP/TWF1/PICALM/ADAP2/PLEKHA4/SNX18/ARAP1	7
MF	GO:0005546	phosphatidylinositol-4,5-bisphosphate binding	5/117	75/17697	1.38e-04	0.015	0.013	TWF1/PICALM/ADAP2/PLEKHA4/SNX18	5
KEGG	hsa05145	Toxoplasmosis	5/58	112/8076	0.001	0.085	0.072	GNAI2/JAK1/LAMA2/TLR4/AKT3	5
KEGG	hsa05167	Kaposi sarcoma-associated herpesvirus infection	6/58	193/8076	0.002	0.085	0.072	CD86/CCR1/GNB1/JAK1/AKT3/GNG2	6
KEGG	hsa04371	Apelin signaling pathway	5/58	137/8076	0.003	0.085	0.072	GNAI2/GNB1/MEF2A/AKT3/GNG2	5
